# Supplementary material for: Gradiently degraded electrospun polyester scaffolds with cytostatic for urothelial carcinoma therapy
Source: Royal Society of Chemistry journal article supplement (doi:10.1039/c8bm01317a), 2018-12-05
Supplement: c8bm01317a1.pdf [file c8bm01317a1.pdf]

## Electronic supplementary information

### Gradiently degraded electrospun polyester scaffolds with cytostatic for urothelial carcinoma therapy

Jixue Wang,<sup>a,b</sup> Guanyu Wang,<sup>c</sup> Hongli Shan,<sup>d</sup> Xiaoqing Wang,<sup>\*a</sup> Chunxin Wang,<sup>\*a</sup> Xiuli Zhuang,<sup>b,e</sup>  
Jianxun Ding<sup>\*b,e</sup> and Xuesi Chen<sup>b,e</sup>

<sup>a</sup>*Department of Urology, The First Hospital of Jilin University, Changchun 130021, P. R. China. E-mail: upw018@126.com, chunxi\_wang@126.com*

<sup>b</sup>*Key Laboratory of Polymer Ecomaterials, Changchun Institute of Applied Chemistry, Chinese Academy of Sciences, Changchun 130022, P. R. China. E-mail: jxding@ciac.ac.cn*

<sup>c</sup>*School of Material Science and Engineering, East China University of Science and Technology, Shanghai 200237, P. R. China*

<sup>d</sup>*Department of Clinical Laboratory, The First Hospital of Jilin University, Changchun 130021, P. R. China.*

<sup>e</sup>*Jilin Biomedical Polymers Engineering Laboratory, Changchun 130022, P. R. China*

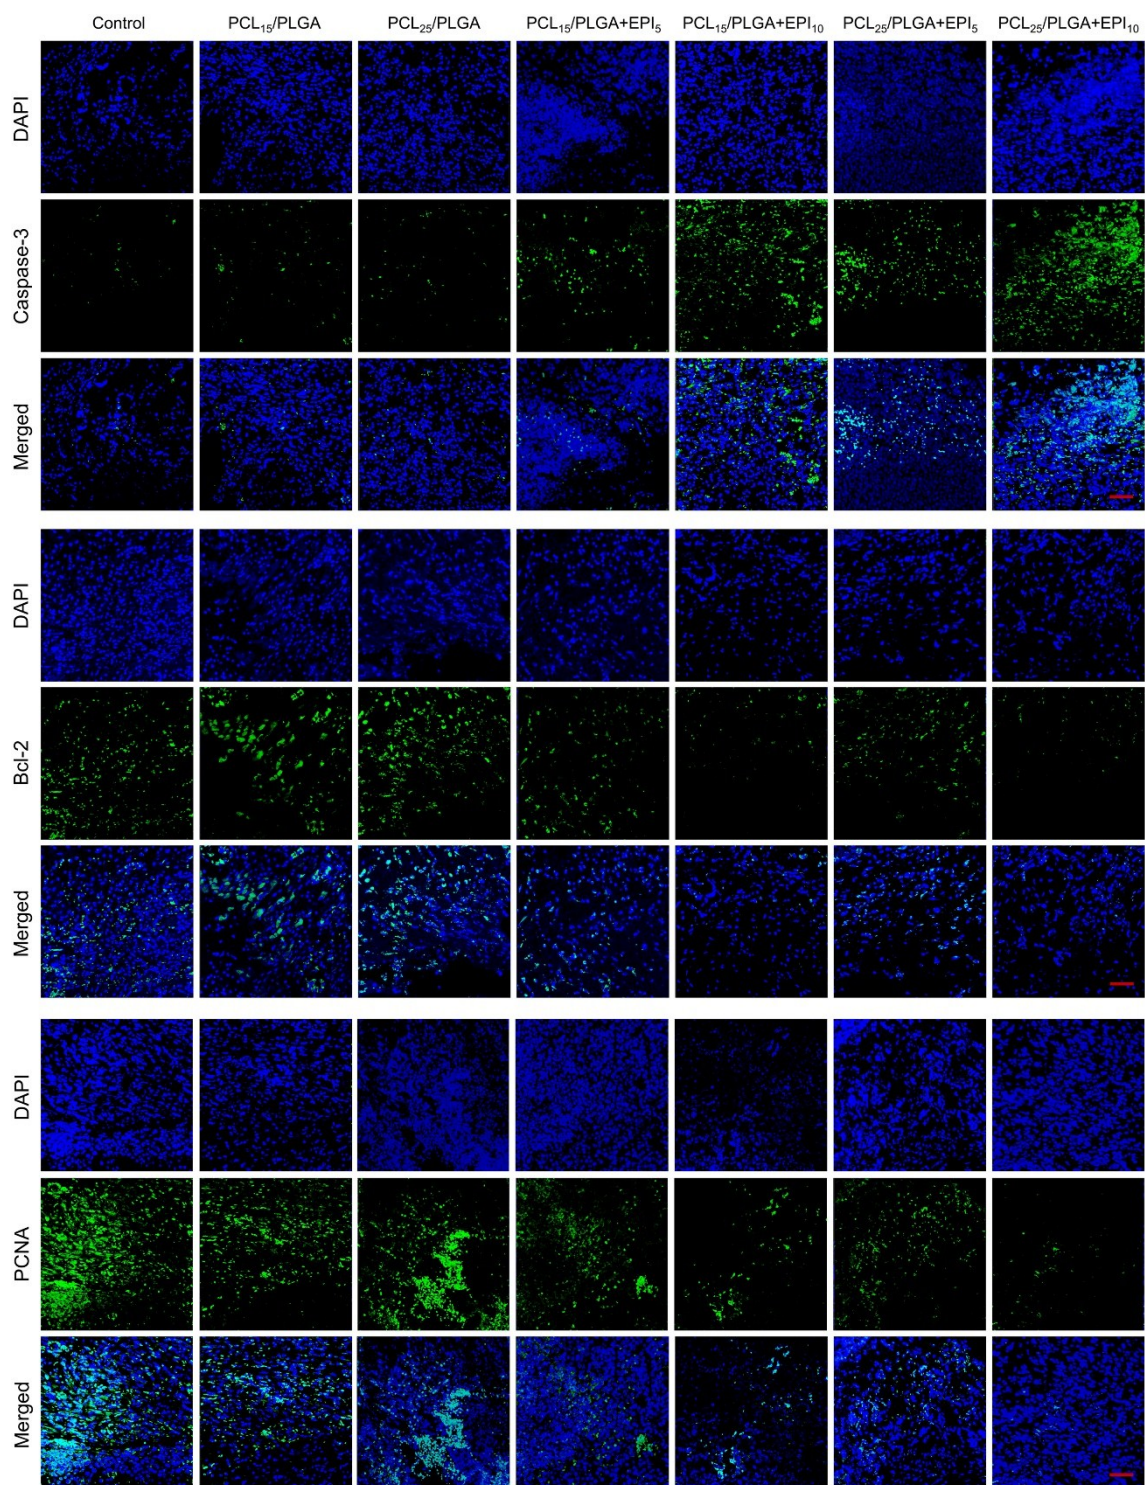

**Fig. S1** Immunofluorescence analyses of expression levels of caspase-3, Bcl-2, and PCNA in tumor tissues. The tumor cell nuclei were stained blue. The caspase-3, Bcl-2, and PCNA antigens were stained with FITC-labeled secondary antibody (green). Scale bar = 50  $\mu$ m.

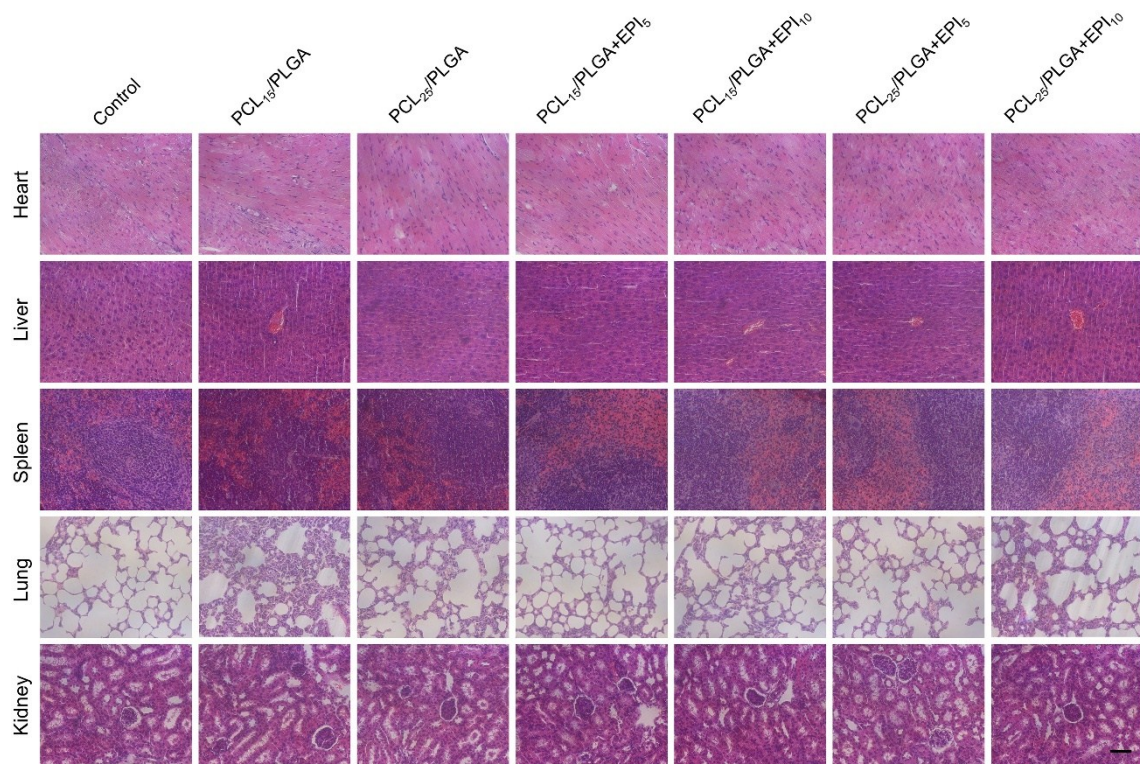

**Fig. S2** H&E staining images of heart, liver, spleen, lung, and kidney of different treatment groups after all treatments. Scale bar = 50  $\mu$ m.
